# Supplementary material
Source: ML conference proceedings conference paper supplement (https://openaccess.thecvf.com/content/CVPR2021/html/Ha_NormalFusion_Real-Time_Acquisition_CVPR_2021_paper.html)
Supplement: Supplementary file 1 [file 01997-supple.pdf › 01997-supple.pdf]

# NormalFusion: Real-Time Acquisition of Surface Normals for High-Resolution RGB-D Scanning Supplemental Document

Hyunho Ha<sup>†</sup>      Joo Ho Lee<sup>\*</sup>      Andreas Meuleman<sup>†</sup>      Min H. Kim<sup>†</sup>

<sup>†</sup> KAIST      <sup>\*</sup> University of Tuebingen

## 1. Hierarchical Nonlinear Optimization

Estimating two unknowns, normal and albedo, from reflected irradiance is a severely ill-posed problem in shape-from-shading (SfS) methods [4, 5]. In order to solve the nonlinear optimization problem of inverse rendering we formulate a total energy function (Equation (3) in the main paper) that seeks optimal depth and albedo  $\mathbf{x} = \{\hat{D}, \mathbf{a}\}$  using the Gauss-Newton optimization [3] as follows:

$$E(\mathbf{x}) = \sum_{\alpha=1}^M r_{\alpha}(\mathbf{x})^2, \quad (1)$$

where  $r_{\alpha}(\mathbf{x})$  is a residual function of each energy term, and  $M$  is the total number of our energy term computed for each valid pixel. Note that given depth value  $\hat{D}$  at pixel  $(i, j)$ , we can calculate a 3D point  $\mathbf{p}$  in the world space as follows:

$$\mathbf{p}(i, j) = \left[ \frac{(i - c_x)}{f_x}, \frac{(j - c_y)}{f_y}, 1 \right]^T \cdot \hat{D}(i, j), \quad (2)$$

where  $f_x, f_y$ , and  $c_x, c_y$  are horizontal/vertical parameters of the focal length and the principal point of the depth camera, respectively. An unnormalized normal vector  $\mathbf{n}'$  can be derived from the cross product of the horizontal/vertical partial derivatives  $\mathbf{n}'(i, j) = (\mathbf{p}(i, j - 1) - \mathbf{p}(i, j + 1)) \times (\mathbf{p}(i - 1, j) - \mathbf{p}(i + 1, j))$ . Finally, we compute a unit normal  $\mathbf{n}(i, j) = \frac{\mathbf{n}'(i, j)}{\|\mathbf{n}'(i, j)\|}$  from the normal vector  $\mathbf{n}'$ .

This energy function can be written in the matrix form as:

$$E(\mathbf{x}) = \|\mathbf{F}(\mathbf{x})\|^2, \quad (3)$$

where  $\mathbf{F}(\mathbf{x}) = [r_1(\mathbf{x}), \dots, r_M(\mathbf{x})]^T$ . The optimal solution  $\tilde{\mathbf{x}}$  can be obtained as follows:

$$\tilde{\mathbf{x}} = \underset{\mathbf{x}}{\operatorname{argmin}} \|\mathbf{F}(\mathbf{x})\|^2. \quad (4)$$

We can approximate the vector field  $\mathbf{F}(\mathbf{x})$  around  $\mathbf{x}_{\beta+1}$  using the first order of Taylor expansion:

$$\mathbf{F}(\mathbf{x}_{\beta+1}) \approx \mathbf{F}(\mathbf{x}_{\beta}) + \mathbf{J}(\mathbf{x}_{\beta})\Delta\mathbf{x}_{\beta}, \quad (5)$$

where  $\mathbf{J}$  is the Jacobian matrix of the residuals, and  $\Delta\mathbf{x}_{\beta} = \mathbf{x}_{\beta+1} - \mathbf{x}_{\beta}$ . Substituting  $\mathbf{F}(\mathbf{x})$  in Equation (4) with in the optimization problem with Equation (5), the Taylor expansion, our final optimization becomes a linear least-squares problem.

$$\Delta\tilde{\mathbf{x}}_{\beta} = \underset{\Delta\mathbf{x}}{\operatorname{argmin}} \|\mathbf{F}(\mathbf{x}_{\beta}) + \mathbf{J}(\mathbf{x}_{\beta})\Delta\mathbf{x}_{\beta}\|^2 \quad (6)$$

Optimal  $\Delta\tilde{\mathbf{x}}_{\beta}$  can be calculated by solving the following linear system:

$$\mathbf{J}(\mathbf{x}_{\beta})^T \mathbf{J}(\mathbf{x}_{\beta}) \Delta\tilde{\mathbf{x}}_{\beta} = -\mathbf{J}(\mathbf{x}_{\beta})^T \mathbf{F}(\mathbf{x}_{\beta}). \quad (7)$$

Since this linear system is very large, it needs to be solved by an iterative method. We implement a GPU-friendly version of the preconditioned conjugate gradient method [3] with two sparse matrix-vector multiplication kernels [6] for efficiently solving of the system.

## 2. Normal/Albedo Blending

Once we know the spatially-varying warp function  $\mathcal{W}^t$ , we are ready to blend normals  $\hat{N}^t$  and albedos  $\hat{A}^t$  with the transferred normals  $\tilde{N}^t$  and albedos  $\tilde{A}^t$  at the current frame  $t$  to the canonical texture space  $\bar{N}^t$  and  $\bar{A}^t$ , respectively. For each texel of a 3D point  $\mathbf{p}$  in the canonical space of TSDFs, we evaluate the spatial resolution and registration certainty of each image pixel by computing blending weights following the current methods [2, 1] as follows:

$$\begin{aligned} \bar{N}^t(\mathbf{p}) &= \frac{\Psi^{t-1}(\mathbf{p})\hat{N}^t(\mathbf{p}) + \psi(\mathbf{p})\hat{N}^t(\tilde{\mathbf{u}})}{\Psi^{t-1}(\mathbf{p}) + \psi(\mathbf{p})}, \\ \bar{A}^t(\mathbf{p}) &= \frac{\Psi^{t-1}(\mathbf{p})\hat{A}^t(\mathbf{p}) + \psi(\mathbf{p})\hat{A}^t(\tilde{\mathbf{u}})}{\Psi^{t-1}(\mathbf{p}) + \psi(\mathbf{p})}, \end{aligned} \quad (8)$$

where  $\tilde{\mathbf{u}}$  is a pixel that corresponds to point  $\mathbf{p}$  via the warp function  $\mathbf{W}$  at the current frame  $t$ . In addition, weight  $\Psi$  is the accumulated weight for normal/albedo blending at the current frame:  $\Psi^t(\mathbf{p}) = \min(\Psi^{t-1}(\mathbf{p}) + \psi(\mathbf{p}), \psi_{\max})$ ,

where  $\psi_{\max}$  is a predefined parameter that controls the upper bound of the blending weight,  $\psi(\mathbf{p})$  is the blending weight for a given camera pose. The current blending weight  $\psi(\mathbf{p})$  can be computed by accounting for the area size, the camera angle, and occlusion:

$$\psi(\mathbf{p}) = \psi_{\text{area}}(\mathbf{p}) \cdot \psi_{\text{angle}}(\mathbf{p}) \cdot \psi_{\text{occ}}(\mathbf{p}), \quad (9)$$

following the weight formulae defined in [2].

We compute the area  $\psi_{\text{area}}$  and the angle weight  $\psi_{\text{angle}}$  as:

$$\begin{aligned} \psi_{\text{area}}(\mathbf{p}) &= \exp(-((1 - (\frac{z_{\min}}{z})^2 \mathbf{n} \cdot \mathbf{o}) / \sigma_{\text{area}})^2), \\ \psi_{\text{angle}}(\mathbf{p}) &= \exp(-((1 - \mathbf{n} \cdot \mathbf{o}) / \sigma_{\text{angle}})^2), \end{aligned} \quad (10)$$

where  $z$  is the depth value of the  $\mathbf{p}$ ,  $z_{\min}$  is the minimum depth of the reconstructed scene,  $\mathbf{o} = (\mathbf{p} - \mathbf{c}) / \|\mathbf{p} - \mathbf{c}\|$  is the camera view vector,  $\sigma_{\text{area}}$  and  $\sigma_{\text{angle}}$  are hyperparameters that controls the smoothness of Gaussian weights, they are set to 1.0 and 0.5, respectively, and  $\psi_{\text{occ}}$  is a soft-occlusion weight factor, following [2, 1].

## References

- [1] C. Buehler, M. Bosse, L. McMillan, S. Gortler, and M. Cohen. Unstructured lumigraph rendering. In *Proceedings of the 28th Annual Conference on Computer Graphics and Interactive Techniques*, SIGGRAPH '01, pages 425–432, 2001.
- [2] Joo Ho Lee, Hyunho Ha, Yue Dong, Xin Tong, and Min H Kim. Texturefusion: High-quality texture acquisition for real-time rgb-d scanning. In *Proceedings of the IEEE/CVF Conference on Computer Vision and Pattern Recognition*, pages 1272–1280, 2020.
- [3] Daniel Weber, Jan Bender, Markus Schnoes, André Stork, and Dieter Fellner. Efficient gpu data structures and methods to solve sparse linear systems in dynamics applications. In *Computer Graphics Forum*, volume 32, pages 16–26. Wiley Online Library, 2013.
- [4] Chenglei Wu, Michael Zollhöfer, Matthias Nießner, Marc Stamminger, Shahram Izadi, and Christian Theobalt. Real-time shading-based refinement for consumer depth cameras. *ACM Transactions on Graphics (ToG)*, 33(6):1–10, 2014.
- [5] Michael Zollhöfer, Angela Dai, Matthias Innmann, Chenglei Wu, Marc Stamminger, Christian Theobalt, and Matthias Nießner. Shading-based refinement on volumetric signed distance functions. *ACM Transactions on Graphics (TOG)*, 34(4):1–14, 2015.
- [6] Michael Zollhöfer, Matthias Nießner, Shahram Izadi, Christoph Rehmann, Christopher Zach, Matthew Fisher, Chenglei Wu, Andrew Fitzgibbon, Charles Loop, Christian Theobalt, et al. Real-time non-rigid reconstruction using an rgb-d camera. *ACM Transactions on Graphics (ToG)*, 33(4):1–12, 2014.
